# Supplementary material for: Association between Vitamin D Genetic Risk Score and Cancer Risk in a Large Cohort of U.S. Women
Source: PubMed Central journal article supplement (PMC5793283; doi:10.3390/nu10010055), 2018-01-09
Supplement: nutrients-10-00055-s001.pdf [file nutrients-10-00055-s001.pdf]

## Supplemental Tables

**Table S1.** Minor allele frequencies of circulating 25OHD SNPs.

| SNP        | Position (nearest gene) | Major/minor allele | Minor allele frequency mean <sup>a</sup> |
|------------|-------------------------|--------------------|------------------------------------------|
| rs11234027 | DHCR7                   | G/A                | 0.16                                     |
| rs7944926  | DHCR7                   | G/A                | 0.25                                     |
| rs12794714 | CYP2R1                  | G/A                | 0.44                                     |
| rs10741657 | CYP2R1                  | A/G                | 0.39                                     |
| rs2282679  | GC                      | T/G                | 0.28                                     |

<sup>a</sup> Allele associated with decreasing circulating 25OHD.

**Table S2.** Pearson correlation coefficients <sup>a</sup>.

| SNP        | Position (nearest gene) | Age, years         | BMI, Kg/m <sup>2</sup> | Exercise, METs/wk |
|------------|-------------------------|--------------------|------------------------|-------------------|
| rs11234027 | DHCR7                   | -0.06 <sup>b</sup> | 0.02                   | -0.02             |
| rs7944926  | DHCR7                   | 0.01               | -0.03                  | -0.01             |
| rs12794714 | CYP2R1                  | 0.01               | 0.03                   | -0.04             |
| rs10741657 | CYP2R1                  | -0.02              | -0.02                  | 0.05              |
| rs2282679  | GC                      | 0.01               | 0.002                  | 0.02              |

<sup>a</sup> all p values >0.05 for Pearson correlation unless otherwise noted; <sup>b</sup> p=0.009.

**Table S3.** Concentration of 25OHD according to genotypes used as instrumental variables in GRS (DHCR7/CYP2R1/GC).

| SNP        |        | Beta(SE)<br>Without BMI | P value | Beta(SE)<br>With BMI | P value |
|------------|--------|-------------------------|---------|----------------------|---------|
| rs11234027 | DHCR7  | 4.1(1.2)                | 0.0004  | 4.3(1.1)             | 0.0002  |
| rs7944926  | DHCR7  | -3.5(0.96)              | 0.0003  | -3.7(0.94)           | <0.0001 |
| rs12794714 | CYP2R1 | 3.3(0.85)               | 0.0001  | 3.5(0.82)            | <0.0001 |
| rs10741657 | CYP2R1 | -3.9(0.85)              | <0.0001 | -4.0(0.82)           | <0.0001 |
| rs2282679  | GC     | 6.0(0.91)               | <0.0001 | 6.1(0.88)            | <0.0001 |

Adjusted for age, year of birth, season, case/control status. SNPs are coded on major allele, referent for season is winter, referent for case-control status is pilot study with and without BMI in regression model. N=1782 European ancestry with successful genotyping.

**Table S4.** Concentration of 25-hydroxyvitamin D mean (SD) nmol/L by genotype copies of risk allele in WGHS subgroup (N=1,782).

| SNP        | Position (nearest gene) | N    | Mean(SD)   |
|------------|-------------------------|------|------------|
| rs11234027 | DHCR7                   |      |            |
| 0          |                         | 32   | 60.5(28.5) |
| 1          |                         | 502  | 65.1(25.5) |
| 2          |                         | 1248 | 69.0(26.2) |
| rs7944926  | DHCR7                   |      |            |
| 0          |                         | 992  | 69.4(26.4) |
| 1          |                         | 676  | 66.4(25.5) |
| 2          |                         | 114  | 62.0(26.0) |
| rs10741657 | CYP2R1                  |      |            |
| 0          |                         | 284  | 71.4(28.6) |
| 1          |                         | 832  | 68.6(27.3) |
| 2          |                         | 666  | 65.2(23.0) |
| rs12794714 | CYP2R1                  |      |            |
| 0          |                         | 335  | 63.8(21.7) |
| 1          |                         | 879  | 68.3(26.1) |
| 2          |                         | 568  | 69.4(28.1) |
| rs2282679  | GC                      |      |            |
| 0          |                         | 161  | 59.9(21.7) |
| 1          |                         | 737  | 65.1(25.7) |
| 2          |                         | 884  | 71.4(26.6) |

**Table S5.** Cox proportional hazards for incident cancer and mortality by circulating vitamin D SNP per allele associated with increase in 25-hydroxyvitamin D.

| SNP                     | Position (nearest gene) | Beta(SE)      | HR(95%CI)       | P value |
|-------------------------|-------------------------|---------------|-----------------|---------|
| <b>Incident Cancer</b>  |                         |               |                 |         |
| <b>Breast</b>           |                         |               |                 |         |
| rs11234027              | DHCR7                   | 0.083(0.051)  | 1.09(0.98-1.20) | 0.10    |
| rs7944926               | DHCR7                   | 0.051(0.042)  | 1.05(0.97-1.14) | 0.22    |
| rs12794714              | CYP2R1                  | 0.021(0.036)  | 1.02(0.95-1.10) | 0.55    |
| rs10741657              | CYP2R1                  | 0.002(0.037)  | 1.00(0.93-1.08) | 0.96    |
| rs2282679               | GC                      | 0.011(0.040)  | 1.01(0.93-1.09) | 0.79    |
| <b>Colorectal</b>       |                         |               |                 |         |
| rs11234027              | DHCR7                   | -0.016(0.106) | 0.98(0.80-1.21) | 0.88    |
| rs7944926               | DHCR7                   | 0.065(0.091)  | 1.07(0.89-1.28) | 0.47    |
| rs12794714              | CYP2R1                  | 0.188(0.079)  | 1.21(1.03-1.41) | 0.02    |
| rs10741657              | CYP2R1                  | 0.200(0.078)  | 1.22(1.05-1.43) | 0.01    |
| rs2282679               | GC                      | -0.072(0.086) | 0.93(0.79-1.10) | 0.41    |
| <b>Lung</b>             |                         |               |                 |         |
| rs11234027              | DHCR7                   | 0.034(0.108)  | 1.04(0.84-1.28) | 0.75    |
| rs7944926               | DHCR7                   | 0.058(0.090)  | 1.06(0.89-1.27) | 0.52    |
| rs12794714              | CYP2R1                  | -0.041(0.078) | 0.96(0.82-1.12) | 0.59    |
| rs10741657              | CYP2R1                  | -0.017(0.080) | 0.98(0.84-1.15) | 0.83    |
| rs2282679               | GC                      | -0.039(0.086) | 0.96(0.81-1.14) | 0.65    |
| <b>Total</b>            |                         |               |                 |         |
| rs11234027              | DHCR7                   | 0.032(0.031)  | 1.03(0.97-1.10) | 0.30    |
| rs7944926               | DHCR7                   | 0.033(0.026)  | 1.03(0.98-1.09) | 0.20    |
| rs12794714              | CYP2R1                  | 0.023(0.022)  | 1.02(0.98-1.07) | 0.30    |
| rs10741657              | CYP2R1                  | 0.029(0.023)  | 1.03(0.98-1.08) | 0.21    |
| rs2282679               | GC                      | -0.019(0.025) | 0.98(0.94-1.03) | 0.46    |
| <b>Mortality</b>        |                         |               |                 |         |
| <b>Total mortality</b>  |                         |               |                 |         |
| rs11234027              | DHCR7                   | 0.025(0.036)  | 1.03(0.96-1.10) | 0.48    |
| rs7944926               | DHCR7                   | 0.019(0.030)  | 1.02(0.96-1.08) | 0.53    |
| rs12794714              | CYP2R1                  | -0.030(0.026) | 0.97(0.92-1.02) | 0.24    |
| rs10741657              | CYP2R1                  | -0.004(0.027) | 1.00(0.95-1.05) | 0.88    |
| rs2282679               | GC                      | -0.022(0.029) | 0.98(0.92-1.04) | 0.44    |
| <b>Cancer mortality</b> |                         |               |                 |         |
| rs11234027              | DHCR7                   | 0.107(0.072)  | 1.11(0.97-1.28) | 0.14    |
| rs7944926               | DHCR7                   | 0.013(0.059)  | 1.01(0.90-1.14) | 0.82    |
| rs12794714              | CYP2R1                  | -0.067(0.051) | 0.93(0.85-1.03) | 0.18    |
| rs10741657              | CYP2R1                  | -0.004(0.052) | 1.00(0.90-1.10) | 0.94    |
| rs2282679               | GC                      | -0.012(0.057) | 0.99(0.88-1.11) | 0.83    |

All SNPs are coded on the allele in the direction of increasing 25OHD per direction of the beta from linear regressions of 25OHD regressed on each of the 5 SNPs (age adjusted). HR calculated in reference to the allele associated with increased 25OHD.

**Table S6.** Mean 25-hydroxyvitamin D level nmol/L for each value of GRS in the case/control cohort (N=1782).

| GRS | N   | Mean(SD)   | Minimum/Maximum 25OHD nmol/L |
|-----|-----|------------|------------------------------|
| 0-1 | 3   | 63.1(16.0) | 47.2/79.2                    |
| 2   | 26  | 56.2(19.1) | 19.7/107.6                   |
| 3   | 64  | 58.3(22.2) | 14.2/124.8                   |
| 4   | 155 | 62.1(21.9) | 18.2/159.4                   |
| 5   | 260 | 65.4(24.2) | 12.0/150.0                   |
| 6   | 362 | 65.0(23.4) | 17.0/169.5                   |
| 7   | 366 | 69.8(28.7) | 10.2/221.9                   |
| 8   | 312 | 72.3(27.5) | 19.7/178.5                   |
| 9   | 159 | 71.2(26.8) | 20.7/171.5                   |
| 10  | 75  | 77.3(29.9) | 26.2/181.7                   |

**Table S7.** Mean 25OHD level nmol/L for each category of GRS in the case/control cohort (N=1782).

| GRS  | N   | Mean(SD)   | Minimum/Maximum 25OHD nmol/L |
|------|-----|------------|------------------------------|
| 0-5  | 508 | 63.0(23.1) | 12.0/159.4                   |
| 6-7  | 728 | 67.4(26.2) | 10.2/221.9                   |
| 8-10 | 546 | 72.7(27.6) | 19.7/181.7                   |

**Table S8.** Cox proportional hazards for cancer and mortality for Genetic Risk Score of alleles associated with increase in circulating 25-hydroxyvitamin D (continuous and categorical) additionally adjusted for BMI.

|                                 | Cases/sample size | Rate/1000pyrs | HR (95% CI)     |
|---------------------------------|-------------------|---------------|-----------------|
| <b>Breast</b>                   |                   |               |                 |
| Continuous                      | 1560/23,294       |               | 1.02(0.99-1.05) |
| Reference                       | 417/6477          | 3.56          | 1.00            |
| GRS 6-7                         | 626/9619          | 3.60          | 1.02(0.90-1.15) |
| GRS 8-10                        | 517/7196          | 4.00          | 1.13(0.99-1.28) |
| <b>Colorectal</b>               |                   |               |                 |
| Continuous                      | 329/23,294        |               | 1.06(1.00-1.13) |
| Reference                       | 83/6477           | 6.90          | 1.00            |
| GRS 6-7                         | 136/9621          | 7.62          | 1.11(0.85-1.46) |
| GRS 8-10                        | 110/7195          | 8.24          | 1.20(0.91-1.60) |
| <b>Lung</b>                     |                   |               |                 |
| Continuous                      | 330/23,294        |               | 1.00(0.94-1.06) |
| Reference                       | 99/6477           | 0.82          | 1.00            |
| GRS 6-7                         | 129/9621          | 0.72          | 0.90(0.69-1.17) |
| GRS 8-10                        | 102/7196          | 0.76          | 0.95(0.72-1.25) |
| <b>Total</b>                    |                   |               |                 |
| Continuous                      | 3985/23,294       |               | 1.01(1.00-1.03) |
| Reference                       | 1091/6468         | 9.71          | 1.00            |
| GRS 6-7                         | 1626/9610         | 9.76          | 1.01(0.93-1.09) |
| GRS 8-10                        | 1268/7183         | 10.23         | 1.06(0.98-1.15) |
| <b>Total Mortality</b>          |                   |               |                 |
| Continuous                      | 2973/23,294       |               | 1.00(0.98-1.02) |
| Reference                       | 850/6477          | 6.87          | 1.00            |
| GRS 6-7                         | 1193/9621         | 6.49          | 0.96(0.88-1.05) |
| GRS 8-10                        | 930/7196          | 6.77          | 0.99(0.91-1.09) |
| <b>Cancer mortality</b>         |                   |               |                 |
| Continuous                      | 770/23,294        |               | 1.00(0.96-1.04) |
| Reference                       | 217/6468          | 1.93          | 1.00            |
| GRS 6-7                         | 305/9610          | 1.83          | 0.96(0.80-1.14) |
| GRS 8-10                        | 248/7183          | 2.00          | 1.05(0.88-1.26) |
| <b>Adjusted for age and BMI</b> |                   |               |                 |

**Table S9.** Cox proportional Hazards for Cancer and Mortality for Genetic Risk Score without vitamin D binding protein (GC) alleles associated with increase in circulating 25OHD (continuous and categorical).

|                         | Cases/sample size | Rate/1000pyrs | HR (95% CI)     |
|-------------------------|-------------------|---------------|-----------------|
| <b>Breast</b>           |                   |               |                 |
| Continuous              | 1560/23,294       |               | 1.02(0.99-1.05) |
| Reference               | 247/3608          | 3.78          | 1.00            |
| GRS 4-5                 | 595/9342          | 3.53          | 0.94(0.81-1.09) |
| GRS 6-8                 | 718/10,342        | 3.85          | 1.02(0.89-1.18) |
| <b>Colorectal</b>       |                   |               |                 |
| Continuous              | 329/23,294        |               | 1.08(1.01-1.15) |
| Reference               | 42/3608           | 6.25          | 1.00            |
| GRS 4-5                 | 131/9344          | 7.57          | 1.24(0.87-1.75) |
| GRS 6-8                 | 156/10,341        | 8.13          | 1.31(0.93-1.85) |
| <b>Lung</b>             |                   |               |                 |
| Continuous              | 330/23,294        |               | 1.00(0.94-1.07) |
| Reference               | 57/3608           | 0.85          | 1.00            |
| GRS 4-5                 | 130/9344          | 0.75          | 0.90(0.66-1.23) |
| GRS 6-8                 | 102/7196          | 0.74          | 0.88(0.65-1.20) |
| <b>Total</b>            |                   |               |                 |
| Continuous              | 3985/23,294       |               | 1.02(1.00-1.04) |
| Reference               | 613/3601          | 9.77          | 1.00            |
| GRS 4-5                 | 1567/9335         | 9.69          | 1.00(0.91-1.10) |
| GRS 6-8                 | 1805/10325        | 10.12         | 1.04(0.95-1.14) |
| <b>Total Mortality</b>  |                   |               |                 |
| Continuous              | 2973/23,294       |               | 1.00(0.98-1.02) |
| Reference               | 483/3608          | 6.99          | 1.00            |
| GRS 4-5                 | 1153/9344         | 6.47          | 0.96(0.87-1.07) |
| GRS 6-8                 | 1337/10,342       | 6.77          | 0.98(0.88-1.09) |
| <b>Cancer mortality</b> |                   |               |                 |
| Continuous              | 770/23,294        |               | 1.00(0.96-1.04) |
| Reference               | 126/3601          | 2.01          | 1.00            |
| GRS 4-5                 | 298/9335          | 1.84          | 0.92(0.75-1.13) |
| GRS 6-8                 | 346/10,325        | 1.94          | 0.97(0.79-1.19) |
